# Supplementary material
Source: PubMed Central journal article supplement (PMC3630850)
Supplement: supp_M113.458257_jbc.M113.458257-1.pdf [file supp_M113.458257_jbc.M113.458257-1.pdf]

## Supplemental Material

to

Expression of Fusion Proteins of *Aspergillus terreus* Reveals a Novel Allene Oxide Synthase

by

**Inga Hoffmann, Fredrik Jernerén, and Ernst H. Oliw**

From the Division of Biochemical Pharmacology, Department of Pharmaceutical Biosciences, Uppsala Biomedical Center, Uppsala University, SE-75124, Uppsala, Sweden

### 1. FIGURE LEGENDS

**Fig. S1.** LC-MS/MS analysis of the apparent D-KIE of 9R-DOX. The first and second chromatograms show the signal intensities of the internal standard (13-HOTrE) and 9R-HODE, respectively. The latter was obtained after incubation with [<sup>13</sup>C<sub>18</sub>]18:2n-6 and reduction to the alcohol. The third and fourth chromatograms show the signal intensities of the internal standard and 9R-HODE obtained after oxygenation of [11,11-2H<sub>2</sub>]18:2n-6, respectively and reduction to the alcohol. The signal intensities suggest a D-KIE of ~4.1.

**Fig. S2.** Western blot analysis of recombinant ATEG. A, ATEG\_04755, 03171, and 03992 were obtained from expression in insect cells (*Sf21*), ATEG\_02036 from expression in insect cells (*Sf9*), and ATEG\_03992\_sv, 00985, and 03580 from expression in *E. coli* (BL21). B, Western blot analysis of AOS·C1073S, AOS·N964D, and AOS·N964V, all obtained from expression in *E. coli* (BL21). The position of the protein size ladder was approximately as indicated.

**Fig. S3.** HPLC-MS/MS analysis of alcohols obtained from recombinant ATEG\_03171, 04755, and 00985 after incubations with 18:2n-6 and reduction. Left, Analysis of 10-HODE obtained from incubation of recombinant ATEG\_03171 and 18:2n-6. The top and bottom chromatograms show chiral separation of the characteristic ions (MS<sup>2</sup> *m/z* 295 → 183 and 155, respectively, demonstrating that the *R*-stereoisomer is mostly formed). Middle, RP-HPLC-MS/MS analysis of 10-HODE formed by ATEG\_04755. Right, Chiral separation of 8-HODE (MS<sup>2</sup> *m/z* 295 → 157) formed from 18:2n-6 by recombinant ATEG\_00985 indicating that the *R*-stereoisomer predominated.

**Fig. S4.** LC-MS analysis of trapped allene oxide. A, NP-HPLC-MS/MS analysis of 9-hydroxy-10-methoxy-octadecadecenoic acid obtained after short time incubation of AOS with 9R-HPODE, yielding 9(10)-EODE, which was trapped with methanol. B, MS/MS spectrum of 9-hydroxy-10-methoxy-octadecadecenoic acid (MS<sup>2</sup> *m/z* 325 → full scan) with characteristic ions, *m/z* 307 (A<sup>-</sup> -18), 293 (A<sup>-</sup> -32, loss of methanol), and 275 (293-18).

**Fig. S5.** Fatty acid composition of *A. terreus* grown in liquid medium (2% malt extract). The MS spectrum shows the total scan of fatty acid carboxylate anions from nitrogen powder of mycelia after alkali treatment and extractive isolation analyzed by direct injection.

**Fig. S6.** Alignment of AOS (ATEG\_02036) with 5,8-LDS (ATEG\_03992) by ClustalW. This alignment shifts the relative positions of the Thr-Xxx-Xxx-Gly-Xxx-Val-Ala-Asn-Xxx-Xxx-Gln sequences (Fig. 5) six positions (see VANxxQ in line AOS 896 and in line 5,8-LDS 876).

**Fig. S7.** NP-HPLC-MS/MS analysis of oxidation products of AOS·N964D and AOS·Q967L. The top and bottom chromatograms show the TICs of MS<sup>2</sup> analyses (*m/z* 311 → full scan) obtained after incubations of 9R-HPODE with AOS·N964D and AOS·Q967L, respectively.

**Fig. S8.** Oxidation of 18:2n-6 by 5,8-LDS:Q881K. NP-HPLC-MS/MS analysis of metabolites. TIC of MS<sup>2</sup> 311 shows increased relative formation of 7,8- and 8,11-DiHODE metabolites, and *erythro* and *threo* epoxyalcohols in comparison to the native recombinant enzyme.

## 2. FIGURES

**Fig. S1**

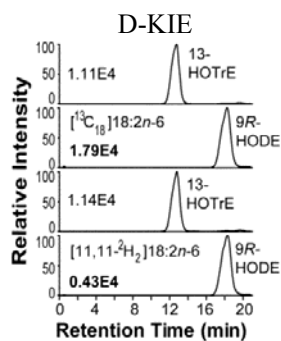

**Fig. S2**

A

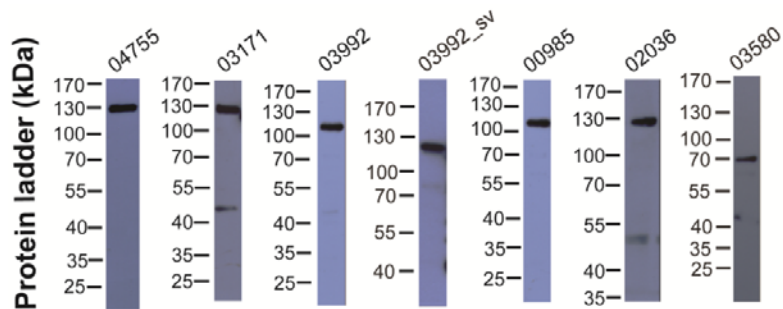

B

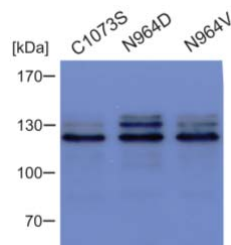

**Fig. S3**

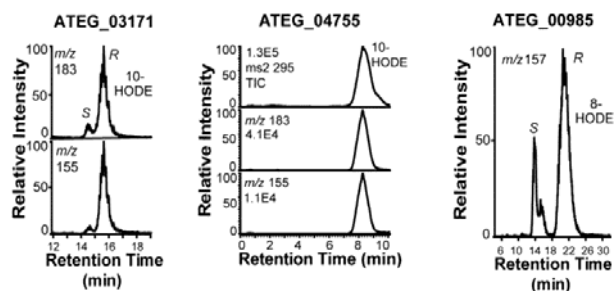

Fig. S4

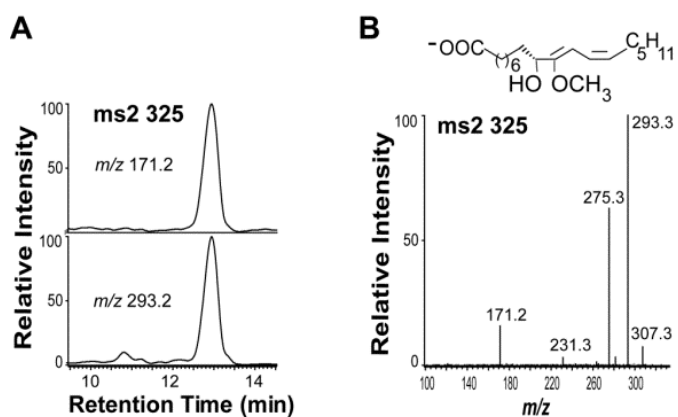

Fig. S5

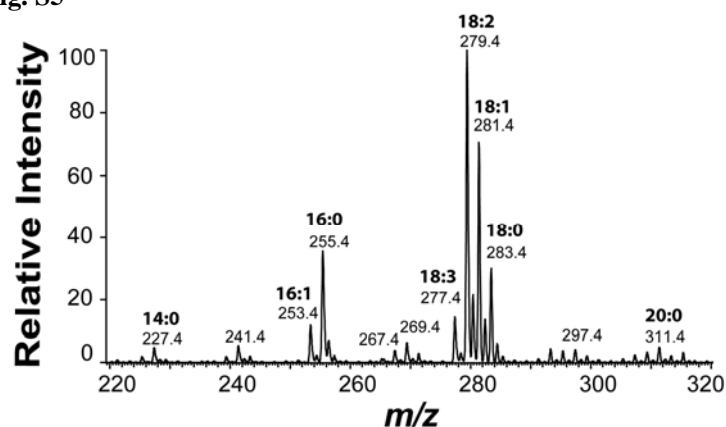

Fig. S6

|         |     |                                                                 |
|---------|-----|-----------------------------------------------------------------|
| AOS     | 1   | SITGTGVGIWSRLYARIFHSDEIAEEEDDEKYOAGEAYGDEKVLATSLIKDLRAIGVKGR    |
| 5,8-LDS | 1   | MQGLCKAISQLEKVATASLRRLPTETGDGSYVA-----ESTATGLVQDLPHVDLG--       |
| AOS     | 61  | RSDLRFTLIEMVK--NKGKPMDDRQMHMEKIITAVAMLPRTSKARQRLTGVLIDQLWRSIQ   |
| 5,8-LDS | 51  | --DLKTLLDVTKNAATGEPIDDKGYVMERLIQLASGLPSTSRNAKQLTSAFINQLWNLDL    |
| AOS     | 119 | HPPISYFGNKYQYRTPDGSYNNPILPNIIGKAGSPYARSIPRIKTMHGVRPDPGLLFDLLM   |
| 5,8-LDS | 109 | HPPVSTVGGGEYSHRSADGSNNILWPGIGAGSHYARSVQPKTMQSPSLDPPEALFDSL      |
| AOS     | 179 | ARDDSTFKENPAGISSVLFYHASICIHDIFRINRRDPNISDTSSYLDLAPLYGSSLEDQL    |
| 5,8-LDS | 169 | ARKD--FKEHPNKISSVLFYIASICIIHDIFQDHRDSSINRTSSYLDLSPLYGNNQDECY    |
| AOS     | 239 | KVRTMEKGMMLKPDITFHEKRIILGQPAGVNVILVMYSRFHNYVADMLLKINENGRFTLPPTS |
| 5,8-LDS | 227 | LNRTFKDGGKLPDCESSKRILGFPFPGVGVLLIMENRFHNYVVEQLAAVNEGGRFTKPF--   |

AOS 299 SEEARKKALAKQDEDFQVARLVVNGLYVNISSLHDYLRGTTNTHHSASDWLDRPTAVGR  
 5,8-LDS 284 -SESNDEKEYAKYDNNLFQTRLVTCGLYINIIILKDYVRTILNINRTNSTWSLDRPMDMKD

AOS 359 TFDPDGVPRGIGNQISAEFNLYRFHSHVISRRDEKWTNIFLKSIFPDLNKPLDQITPQEF  
 5,8-LDS 343 GLLGDAPLATGNQVSAEFNLYRWHSCISQRDEKWTTELYNDIFSDKGGQ--EDLPLNEF

AOS 419 MMGLMRYEQSIDKDPKREFFGLKRSPPDGKFNADLVQIILKDSMEDPAGLFGPRNVPKAL  
 5,8-LDS 401 MMGVGKWEAGLPQQPAERPFAGLKRKPNGLFDDDDLVTIFKESVEDCAGAFGASHVETIF

AOS 479 RMIEIAGIMSARKWDLGSLNEMRDFFKLKRHATFEDINPDPEIADLLRRLYDHPDMVEMY  
 5,8-LDS 461 KSIETSLGIKQARAWNLATLNEIRQYFGLTPHKTFFEDINSDPYIISEQLRRLYDHPDQVEITY

AOS 539 PGFIEDAKPRLDPGCCGPPYTVGRAVFSDAVTLVRSDFRFLTLDYTASNLTNWGFREVQ  
 5,8-LDS 521 PGVIVVEETKESMLPGSGLCTNFTISRAILSDAVALVRGDRFYTVDYTPKQLTNWAFTEIQ

AOS 599 QDYDILGGSMFHKLIQRALPGWEPYNSLHATQPMFTRKMNEQIAREIGTIIDHYSLADPAP  
 5,8-LDS 581 PKDSVDQGHMFHKLIVYRAFPNFKGNSVYAHFPMVVPSENQKILTALGSAEKYSWDKPGF

AOS 659 PPRKIVLTDYATNIKVLKDCASFRVPWARYLNDMFP---GKTYNDYMLGGDDPANAAQKK  
 5,8-LDS 641 IHPPQFINSHSTCVSILADQETFKVSWGDKIEFLMSNHDKIYGKDFMLS GDRLPNAESRK

AOS 716 LVHSILFSPDQFLDLLSETTKLGSELLKANTLWTKDLHQVDIIRDVAIPLNARIMADL  
 5,8-LDS 701 MNGAALYT-DQWEEEVKKFYEKITLKLKKSYSKLAG-VNOVDIIRDVANLAGVNFCAV

AOS 776 FCLDNKTPENPTGSMNAATVYRHIMNVRIWGFNNNDPALMLQRRKWAIESAEALLETIRK  
 5,8-LDS 759 FSLPKTEASPRGIFTESELYMMAAVFAAIFYDADPANSFALNQAAREVTQQLGQVIMA

AOS 836 IVNEQAQPAQSGVLKNLVTRRQATGTLRWYGNNAKEMMEMGMSAEVADICWLTAIGGV  
 5,8-LDS 819 NVELIHK---TGFI SNLVNGLQRHDVLSNYGIHMIQRLLASGLPASEIVWTHLPTAGGM

AOS 896 GTPSC-VVANVLQYYFRYENIGHWEEIQKLVTPDTPAADRTLROYYVLEANRLTSMECTV  
 5,8-LDS 876 VANQGQLFSQCLDYYLSEEGSVHLPEINRLAKEN-TPEADELLRLRYFMEGARLRSVGLP

AOS 955 RVCARPVTVDG----HDFKPGEVIVNHLGLACRDPHNIPADAKFRLDRPASAYIQMGYGA  
 5,8-LDS 935 RVVAKPTVIDDNGTKLTLKECOHILCNLVAASHDPVVSFPEPEKVRLLDRDMDLYVHFGSGP

AOS 1011 HECLGKETAITFAVSMIRILAGLKYLRPAPGEMGVLSVMADG--RQAFNLDSWSLTDQD  
 5,8-LDS 995 HKCLGFGLCKLGLTITMLKVVCGLDNLRRAPGPGQQLKRIACPGGISKYMTADQSGFFPFP

AOS 1069 PTSSKSNMHGKASAVD--  
 5,8-LDS 1055 TIMKIQWDGDLPEPASD

Fig. S7

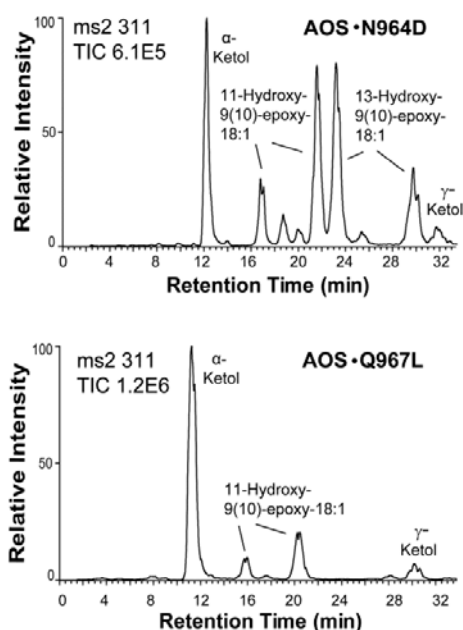

Fig. S8

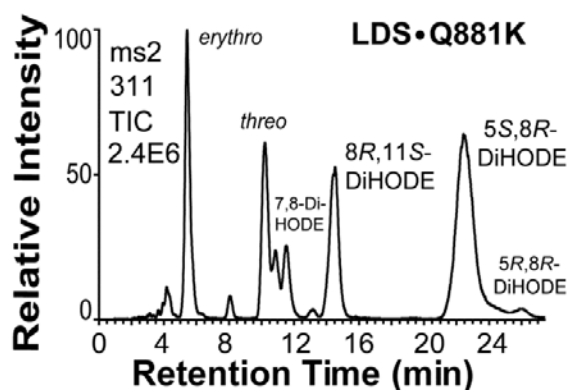

### 3. METHODS - CLONING AND EXPRESSION IN INSECT CELLS

*ATEG\_00985*, *02036*, *04755*, and *03580* – All genes were amplified in two pieces from cDNA by PCR or semi-nested PCR technology. Primers F1 and R1 yielded the 5'-fragments and primers F2 and R2 the 3' fragments, respectively. F1 and R2 primers introduced unique restriction sites needed for further cloning steps, and R2 primers also disrupted the native stop codons. Fragments were cloned into pJET1.2/blunt and all genes were assembled by using unique restriction sites (00985: *Asi*I, 02036: *Xcm*I, 04755: *Sac*II, 03580: *Xba*I) in their overlapping regions. Subcloning to expression vector pIZ/V5-His was performed using *Spe*I and *Xba*I (for 03580: *Kpn*I/*Sac*II) so that all constructs were in frame with the V5 and 6xHis-tag.

*ATEG\_03171* – An 1806-bp 5'-fragment including introns 1-3 was amplified using primer 03171F<sub>1</sub> and 03171R<sub>1</sub> from genomic DNA. A smaller fragment of 784-bp was amplified from cDNA using the same forward primer as above, along with primer 03171R<sub>E1</sub>. Both amplicons were subcloned into pJET1.2/blunt and were subsequently combined into a 1657-bp 5'-fragment of cDNA lacking intron 1-3 using *Spe*I/*Eco*RI. A 1796-bp 3'-fragment was amplified from cDNA using primer 03171F<sub>2</sub> and 03171R<sub>2</sub> and ligated into pJET1.2. The reverse primer disrupted the stop codon and

introduced a downstream XbaI site. Full-length cDNA was generated using EcoRI and XbaI in pJET1.2, and ligated into pIZ/V5-His using SpeI/XbaI in-frame with the V5 epitope and 6xHis-tag, yielding pIZ/V5-His\_03171.

*ATEG\_03992* – ATEG\_03992 was cloned from cDNA in two pieces. The 1738-bp 5'-fragment was generated by PCR with primers 03992F1 and 03992R1. 03992F1 introduced a SpeI site. PCR with F2 and R2 yielded in addition to the expected amplicon of 1607-bp an amplicon of 1672-bp. The latter was a splice variant of fragment two and is designated fragment 2sv. Primer R2 disrupted the stop codon and introduced EcoRV sites. All three amplicons were cloned into pJET1.2/blunt. Fragment 1 was combined with fragment 2 and fragment 2sv, respectively, by PCR technology. Subcloning of ATEG\_03992 and ATEG\_03992sv to expression vector pIZ/V5-His was performed using SpeI and EcoRV restriction sites.

#### 4. RESULTS - CLONING AND EXPRESSION

*ATEG\_03171 (10R-DOX activity)* – The deduced amino acid sequence of ATEG\_03171 (GenBank, AFB71132) of the strain IBT1948 differed from the deduced protein (EAU36445) at 17 positions (K63E, H67R, L194W, S205T, K291R, P349R, M702T, V708I, T758I, S761G, D850N, G983A, N987H, K1016N, I1017V, V1072A, M1091K, and M1110T).

ATEG\_03171 converted 18:2n-6 to small amounts of 10-HODE, and CP-HPLC-MS/MS analysis revealed that the *R* stereoisomer dominated (Fig. S4). The enzyme activity was two orders of magnitude lower than obtained with recombinant 10R-DOX. It is therefore possible that ATEG\_03171 oxidizes other substrates than fatty acids more efficiently.

*ATEG\_00985 (orphan)* – Cloning of ATEG\_00985 revealed a cDNA fragment of 3183-bp that differed in several nucleotides from the predicted sequence (GenBank, EAU37742.1). We observed the following amino acid exchanges: M116S, S117N, Q118N, and N184D. The residues TLLARKGPAKEHPTRVSSTLFYLATIIH and VTCS follow residues D145 and L300, respectively, and derive from different exon-intron borders compared to the predicted sequence. An additional intron including genomic nt 3321-3374 (gta...cag) leads to loss of V845-Q862 in the predicted amino acid sequence.

Sequence alignment showed 5,8-LDS as its closest relatives (Fig 2A). The recombinant protein did not transform 9R- or 8R-HPODE, but oxidized 18:2n-6 to small amounts of 8-HODE and the *R* stereoisomer dominated (Fig. S4). Since this protein did not have AOS or 9R-DOX activities, it was not further investigated.

*ATEG\_03580 (orphan; DOX domain)* – Cloning of ATEG\_03580 yielded a cDNA fragment of 1851-bp with four introns as predicted (GenBank, EAU35382.1) and no amino acid substitutions. This protein thus lacked the CYP domain. We could not detect significant oxidation of C<sub>18</sub> fatty acids by the recombinant protein, and it was not further investigated.

#### 5. TABLES

**Table S1.** Oligonucleotides used for real-time PCR analysis.

| Primer pairs    | Sequences                 |
|-----------------|---------------------------|
| qF-03580-alt    | 5'-gctccggtgtaaccactt     |
| qR-03580-alt    | 5'-aaataccctggtgaaagggc   |
| qF-06973-alt    | 5'-tgaagctctcttcagccta    |
| qR-06973-alt    | 5'-tgacctcatggaagaggga    |
| qF-03992fl-alt  | 5'-ctggcacggaagactcaa     |
| qR-03992fl-alt  | 5'-ttgctcgagaagcaatctgg   |
| ATEG_04755-F    | 5'-gaggctcagaccgactcac    |
| ATEG_04755-R    | 5'-ccgagaccgaactggatga    |
| ATEG_00985-F(3) | 5'-aactgatcgtctctacgtcc   |
| ATEG_00985-R(3) | 5'-atggtagaatcctctgttacct |
| ATEG_03171-F    | 5'-gtttaaactcggcctga      |

ATEG\_03171-R 5'-accctctccgtagtggaggt  
 ATEG\_02036-F 5'-gccaccgtctgaccagtat  
 ATEG\_02036-R 5'-gtccagccggaatttatcg

**Table S2.** List of cloning primers.

| Primer pairs          | Sequences                         |
|-----------------------|-----------------------------------|
| 00985F1               | 5'-ACTAGTatgacgtacaacgatagaagg    |
| 00985R <sub>1</sub>   | 5'-gttagattgaccgggcatag           |
| 00985F <sub>2</sub>   | 5'-gtggccatactgtcagatgcag         |
| 00985R <sub>2</sub>   | 5'-TCTAGATAaatactatcaaatagtgccttc |
| 02036 F <sub>1</sub>  | 5'-ACTAGTatgtcctctgtcatcgttgc     |
| 02036 R <sub>1</sub>  | 5'-caagcgtgacagcatcactg           |
| 02036 F <sub>2</sub>  | 5'-agacatggtcgaaatgtatcc          |
| 02036 R <sub>2</sub>  | 5'-GTTCTAGAAagtccactgcgcttg       |
| 04755 F <sub>1</sub>  | 5'-ACTAGTatgttgccggaggttttctacc   |
| 04755 R <sub>1</sub>  | 5'-ttgtagtcgatcgtgtaatgacg        |
| 04755 F <sub>2</sub>  | 5'-ctgttctatcggatgcagtggc         |
| 04755 R <sub>2</sub>  | 5'-TCTAGATacgcggaggcgattccgcgct   |
| 03580 F <sub>1</sub>  | 5'-GGTACCatggagccaccaatttc        |
| 03580 R <sub>1</sub>  | 5'-tggattcccagcgttatcag           |
| 03580 F <sub>2</sub>  | 5'-gcgaccaaacacaaggatg            |
| 03580 R <sub>2</sub>  | 5'-CCGCGTcccttgatgctgcagac        |
| 03171 F <sub>1</sub>  | 5'-ActAGTatgaaattcaaccagaccacag   |
| 03171 R <sub>1</sub>  | 5'-gcttcaattgaagaactg             |
| 03171 R <sub>E1</sub> | 5'-ggtggccggttggagatat            |
| 03171 F <sub>2</sub>  | 5'-atagacgagcagcaagtg             |
| 03171 R <sub>2</sub>  | 5'-TCTAGATAaaccggtccatcgaatg      |
| 03992 F <sub>1</sub>  | 5'-ACTAGTatgcaggggaattggaaaagc    |
| 03992 R <sub>1</sub>  | 5'-ccgtgaaagccaattgtaag           |
| 03992 F <sub>2</sub>  | 5'-tctgcaccaactcacaatctcg         |
| 03992 R <sub>2</sub>  | 5'-GATATCatccgagcaggttcaggc       |

**Table S3.** Oligonucleotides used for subcloning into pET101D-TOPO

| Primer pairs    | Sequences                    |
|-----------------|------------------------------|
| Cham04755F      | 5'-CACCatgttgcggaggtttctac   |
| Cham04755R      | 5'-cgcggaggcgattccgcgcttcttc |
| Cham03580F      | 5'-CACCatggagccaccaatttc     |
| Cham03580R      | 5'-tcccttgatgctgcagactcagg   |
| Champ_03992fl_F | 5'-CACCatgcaggggaattggaaaag  |
| Champ_03992fl_R | 5'-atccgagcaggttcaggcaaatc   |
| Cham03992_svR   | 5'-tgtacttggaatccaccaggcc    |
| Champ_00985_F   | 5'-CACCatgacgtacaacgataga    |
| Champ_00985_R   | 5'-aatactatcaaatagtgccttctt  |
| Cham_02036_F    | 5'-CACCatgtcctctgtcatcgttg   |
| Cham_02036_R    | 5'-gtccactgcgcttgctttgccatg  |
| F-champ_03171   | 5'-CACCatgaaattcaaccagaccac  |
| R-champ_03171   | 5'-aaccggtccatcgaat          |

**Table S4.** Oligonucleotides used for site-directed mutagenesis.

| Enzyme         | 5' - Forward primer                         | 5' -Reverse primer                           |
|----------------|---------------------------------------------|----------------------------------------------|
| <b>5,8-LDS</b> |                                             |                                              |
| N878L          | cggctggcgggatgtagcgCTccaaggacaactctttcgc    | gcgaaaagagttgtccttggAGcgctaccatcccgccagccg   |
| Q879L          | ctggcgggatgtagcgaaccTaggacaactcttttcgcaatgc | gcattgcgaaaagagttgtcctAggttcgctaccatcccgccag |
| Q881L          | gatgtagcgaaccaaggacTactcttttcgcaatgcctgac   | gtcaaggcattgcgaaaagagtAgtccttggttcgctaccatc  |
| Q881E          | gatgtagcgaaccaaggaGaactcttttcgcaatgcctgac   | gtcaaggcattgcgaaaagagtTccttggttcgctaccatc    |
| Q881K          | gatgtagcgaaccaaggaAaactcttttcgcaatgcctgac   | gtcaaggcattgcgaaaagagtTtcttggttcgctaccatc    |
| Q881D          | gatgtagcgaaccaaggaGaCctcttttcgcaatgcctgac   | gtcaaggcattgcgaaaagagGtCtcttggttcgctaccatc   |
| Q881N          | gatgtagcgaaccaaggaAaCctcttttcgcaatgcctgac   | gtcaaggcattgcgaaaagagGtTtcttggttcgctaccatc   |
| <b>AOS</b>     |                                             |                                              |
| T957A          | cgcattggggcggtggaGcgccctctggagttgttgccaatg  | cattggcaacaactccagagggcgCtccaacgcccccaatggcg |
| S959A          | cattggggcggtggaacgcccGctggagttgttgccaatgtgc | gcacattggcaacaactccagCgggcggtccaacgcccccaatg |
| N964V          | gccctctggagttgtgcccGTgtgctgcagtactactccgc   | gcggaagtagtactgcagcacaACggcaacaactccagagggc  |
| N964D          | gccctctggagttgtgcccGatgtgctgcagtactactccgc  | gcggaagtagtactgcagcacatCggcaacaactccagagggc  |
| Q967L          | gagttgttgccaatgtgctgTTgtactactccgctatgaaaac | gtttcatagcgggaagtagtacAAcagcacattggcaacaactc |
